# Supplementary material for: Seasonal and diel variations in the vertical distribution, composition, abundance and biomass of zooplankton in a deep Chilean Patagonian Fjord
Source: PeerJ journal article supplement (doi:10.7717/peerj.12823), 2022-01-25
Supplement: Fig_S1_RDA_20211215.pdf [file Fig_S1_RDA_20211215.pdf]

**A**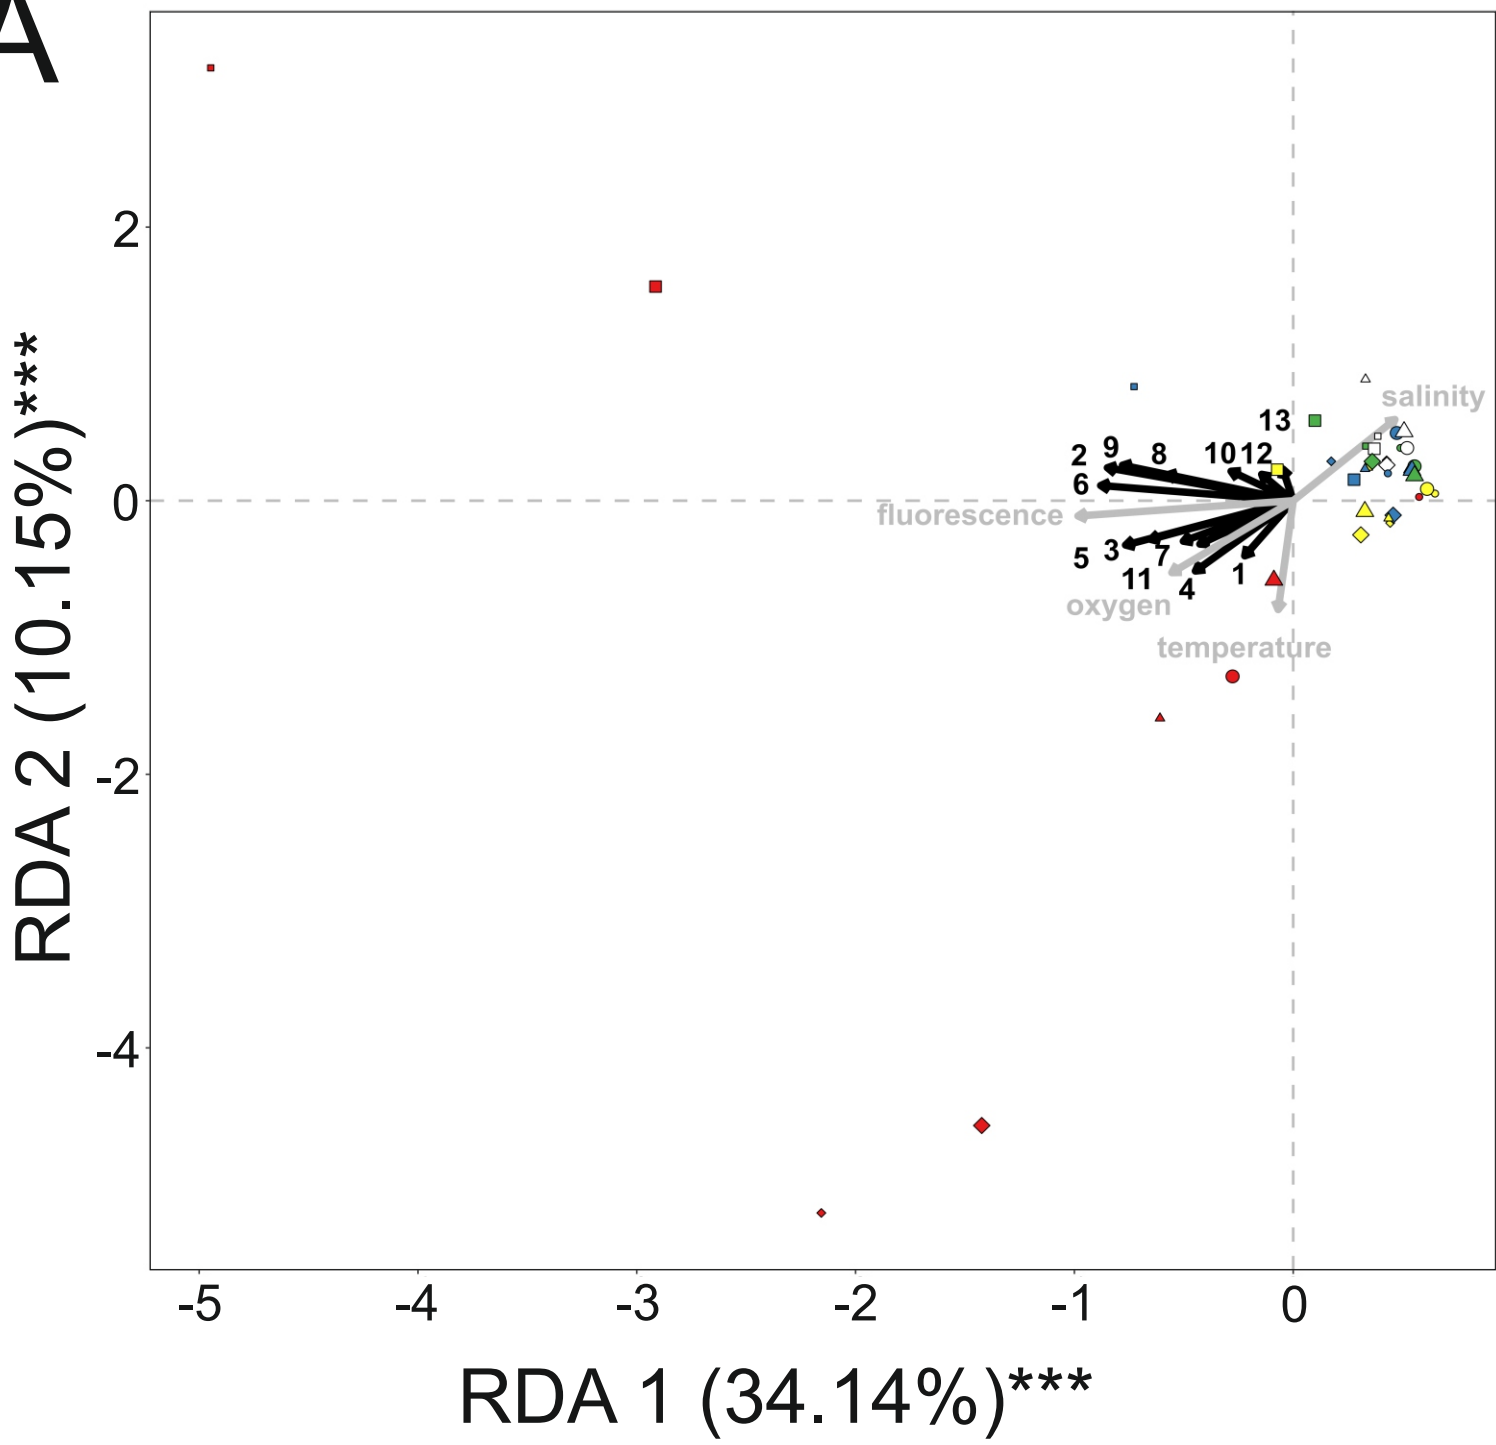**B**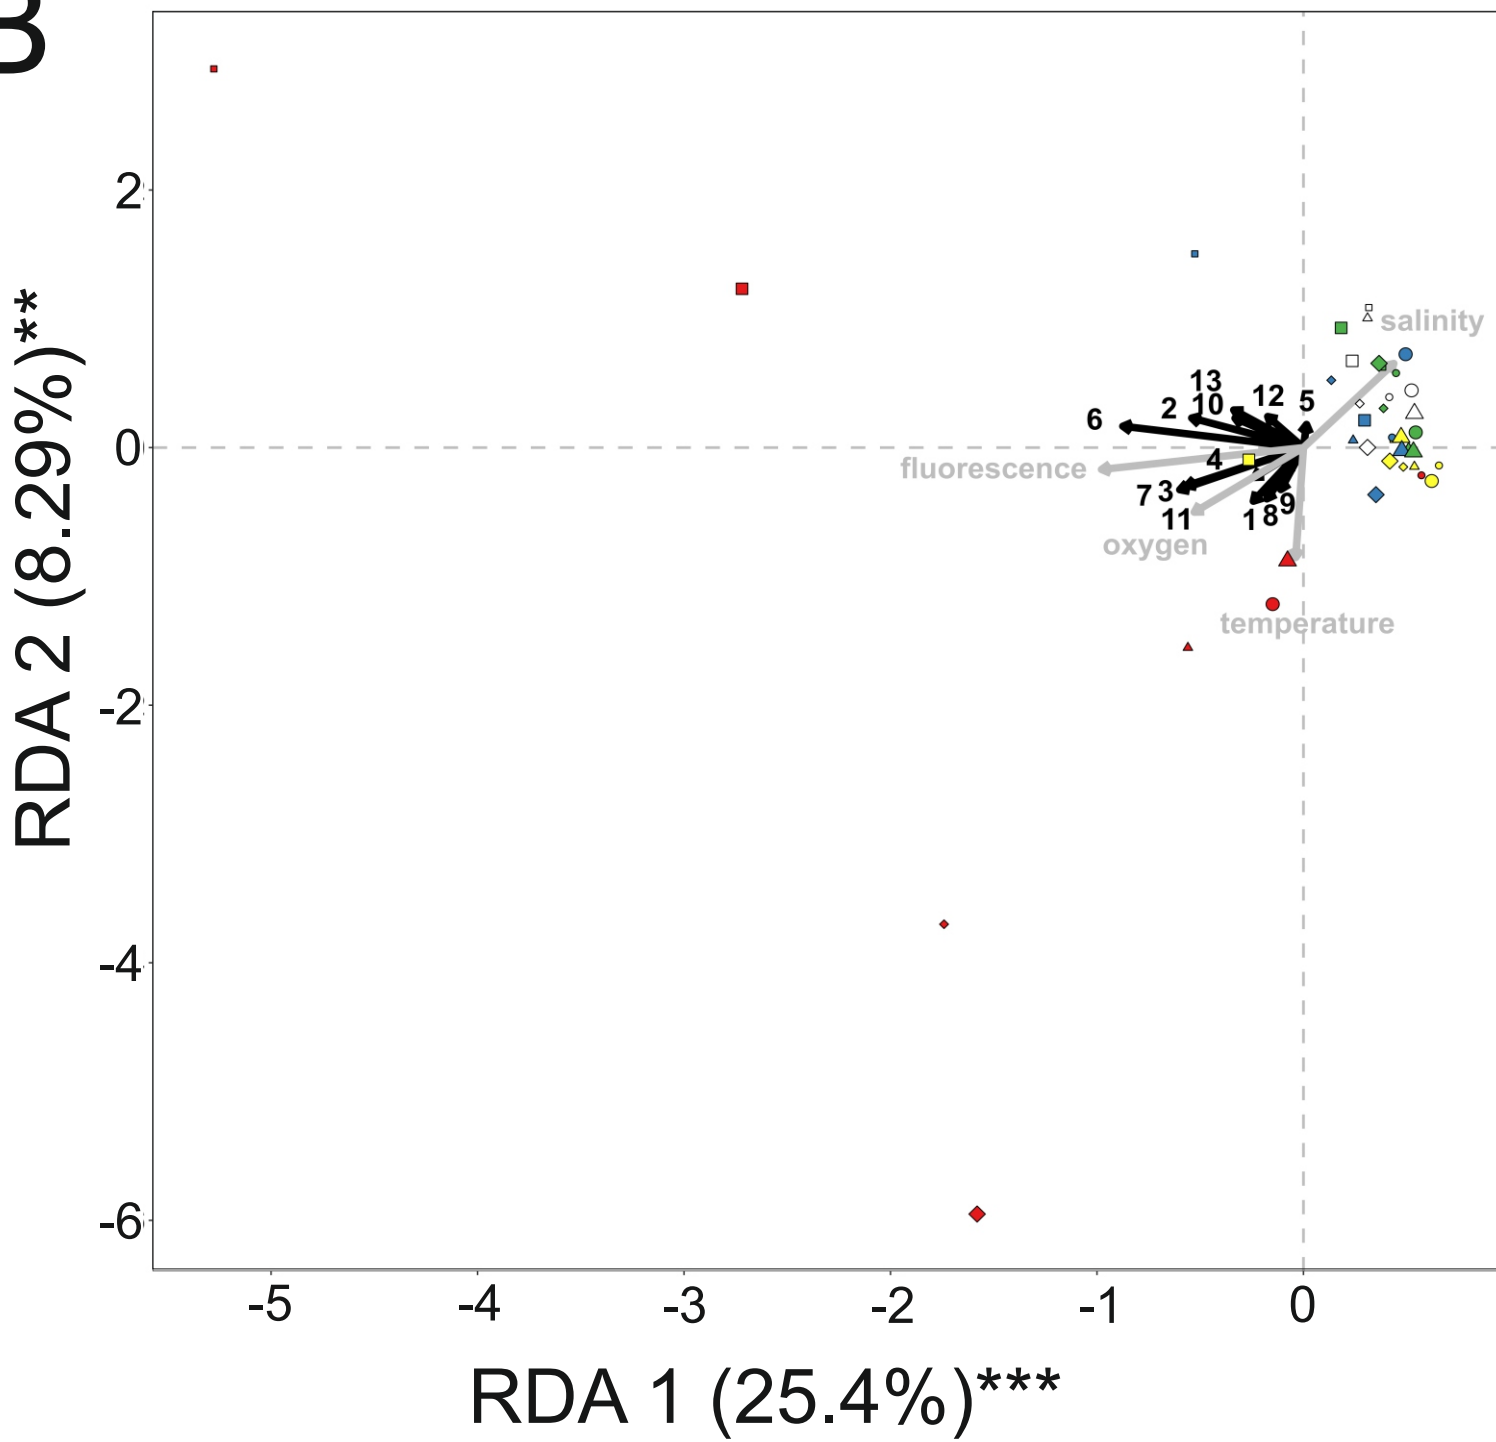

- 0-50    ● 50-100    ● 100-200    ● 200-300    ○ 300-400
- Day    ● Night
- Spring    ◇ Summer    ○ Autumn    △ Winter
